# Supplementary material for: The genomic landscape of pediatric myelodysplastic syndromes
Source: PubMed Central journal article supplement (PMC5691144; doi:10.1038/s41467-017-01590-5), 2017-11-16
Supplement: 41467_2017_1590_MOESM1_ESM.pdf [file 41467_2017_1590_MOESM1_ESM.pdf]

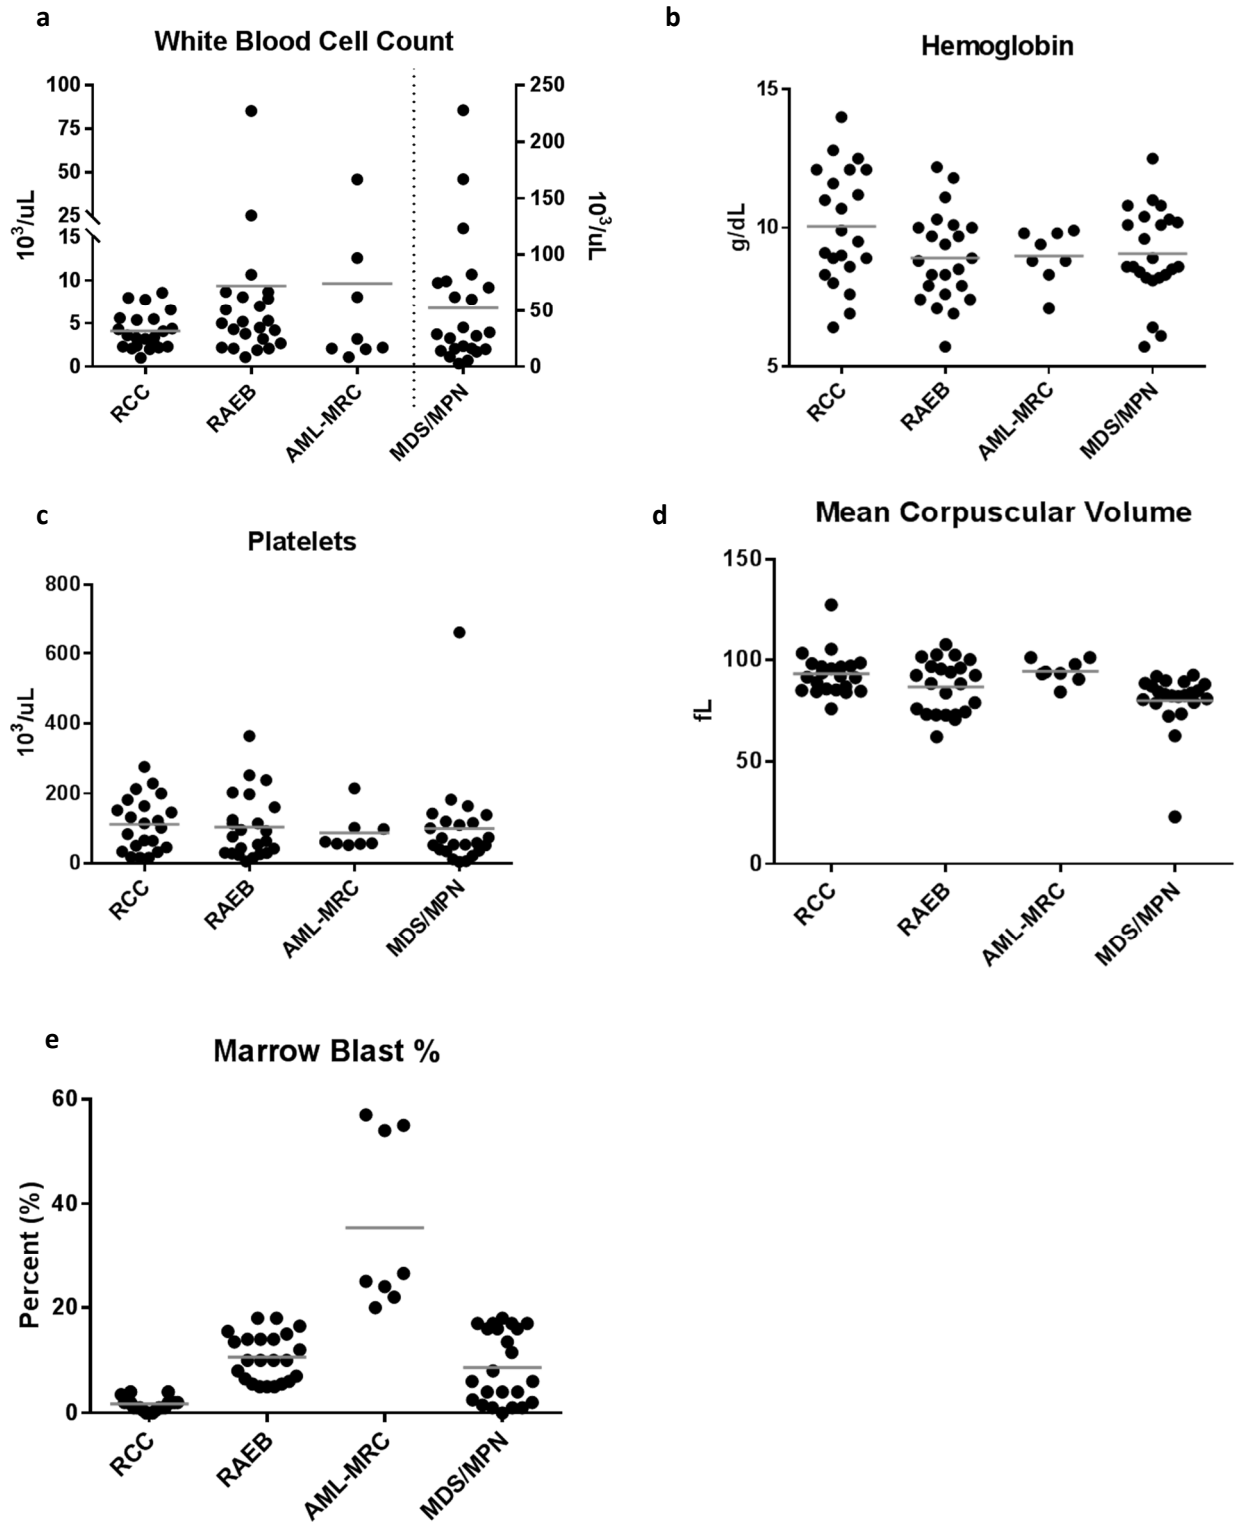

**Supplementary Figure 1:** a-d.) CBC values by subtype. e.) Bone marrow blast % at the time of diagnosis by subtype.

A. SJ018228

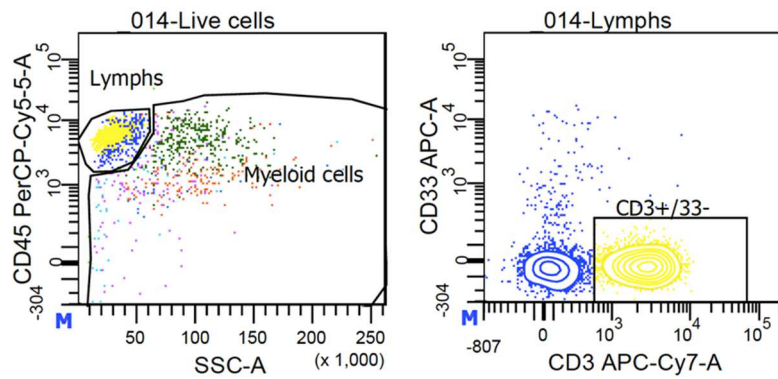

B. SJ018224

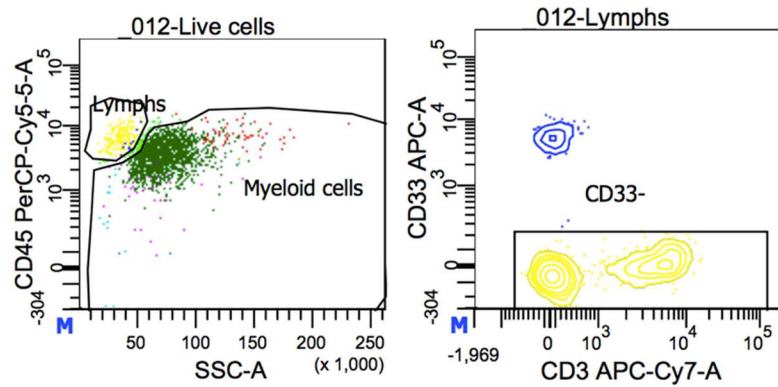

**Supplementary Figure 2: Flow sorting strategy to collect normal and tumor gDNA.** Two (A & B) representative examples of pediatric MDS demonstrating the separation of live cells (via DAPI exclusion) by CD45 expression and side scatter characteristics (left). Contaminating myeloid cells in the lymphocyte gate were excluded using CD33 expression. When sufficient numbers were available, we collected only CD3+ T-cells (top). If not, we collected all CD33<sup>neg</sup> events in the lymphocyte gate (bottom). Myeloid cells were collected based on side scatter and CD45 expression.

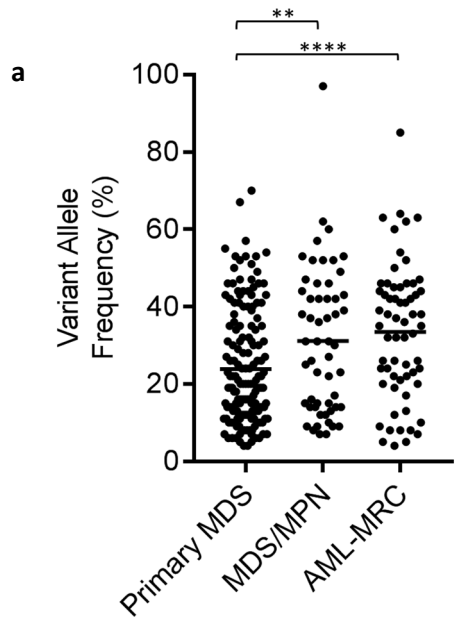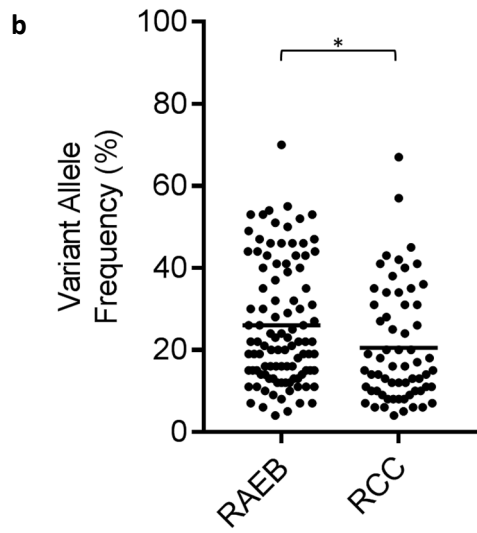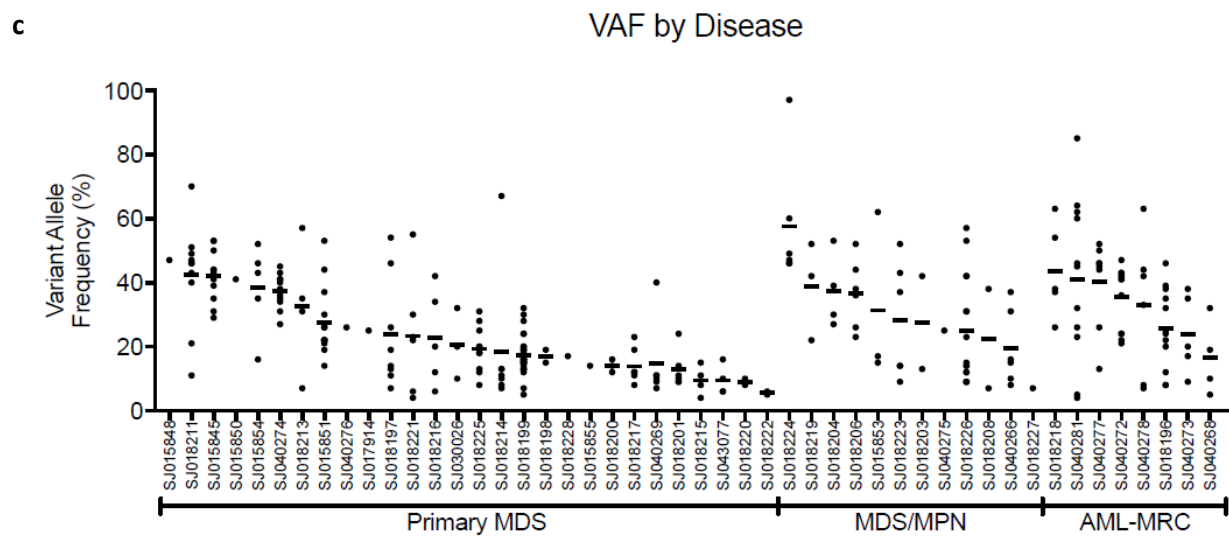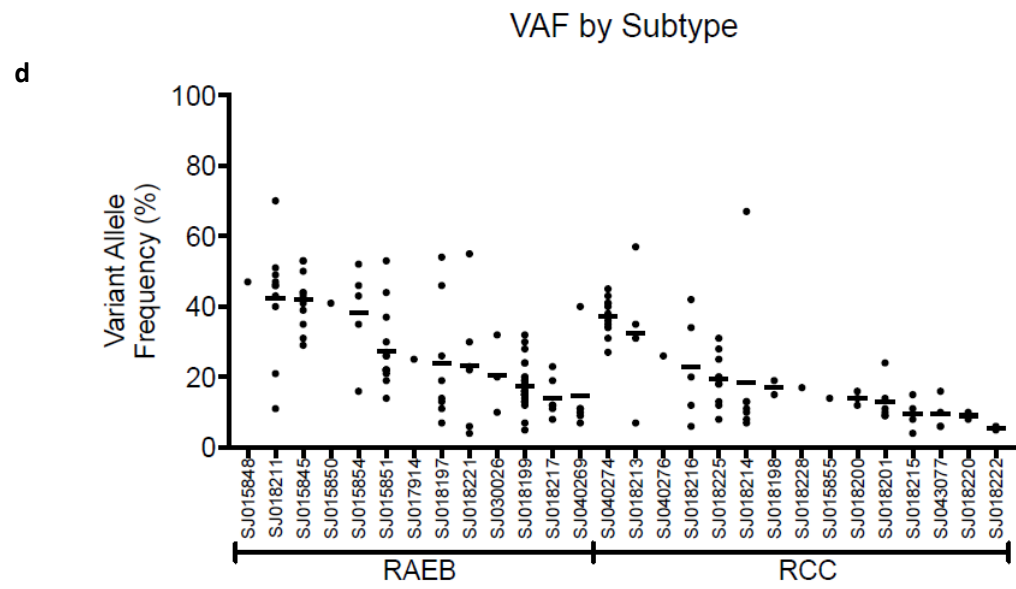

**Supplementary Figure 3: Somatic mutation VAF's determined by WES.** a.) All somatic mutation VAF's categorized by diagnosis (n=54). \*\*:  $p < 0.01$ ; \*\*\*\*:  $p < 0.0001$  (student's t-test). b.) All somatic mutation VAF's within the primary MDS cohort categorized by disease subtype (n=32). \* $p < 0.05$  (student's t-test). c.) All somatic mutation VAF's shown per patient. d.) All somatic mutation VAF's within the primary MDS cohort shown per patient. Six patients are not shown given the lack of somatic mutations (RCC: 3; RAEB: 1; MDS/MPN: 2).



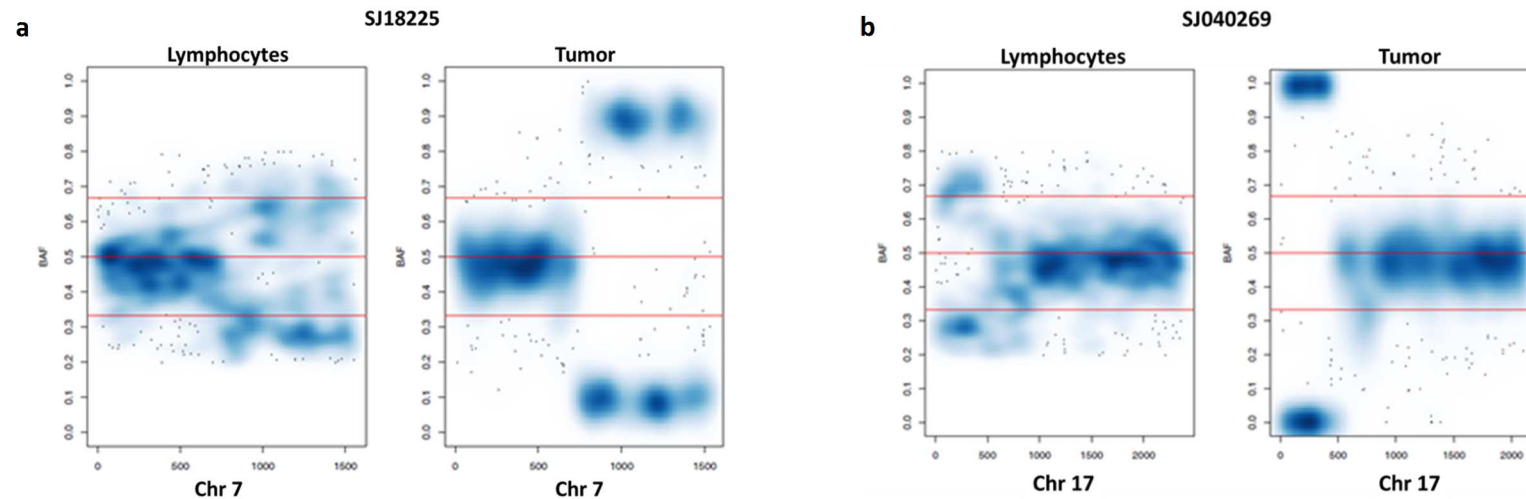

**Supplementary Figure 5: Copy number alterations found in the pediatric MDS cohort in the lymphocyte samples.** Three cases in the exome cohort showed evidence of subclonal CN-LOH events in the lymphocyte exome data. Considering the subclonal nature, we favor these to be acquired events, rather than germline. a.) Allele frequency plot of an RCC patient with subclonal chromosome 7q CN-LOH in the lymphocytes with a clonal chromosome 7 CN-LOH in the MDS tumor population. This CN-LOH region includes the *SAMD9/SAMD9L* locus in a patient with a germline *SAMD9L* mutation. We also previously reported the CN-LOH involving 7q in SJ018228 that involves the *SAMD9/SAMD9L* locus<sup>2</sup> (Data not shown here). b.) A RAEB patient with chromosome 17p CN-LOH, that includes *TP53*. In the MDS tumor cells, there appears to be a clonal event.

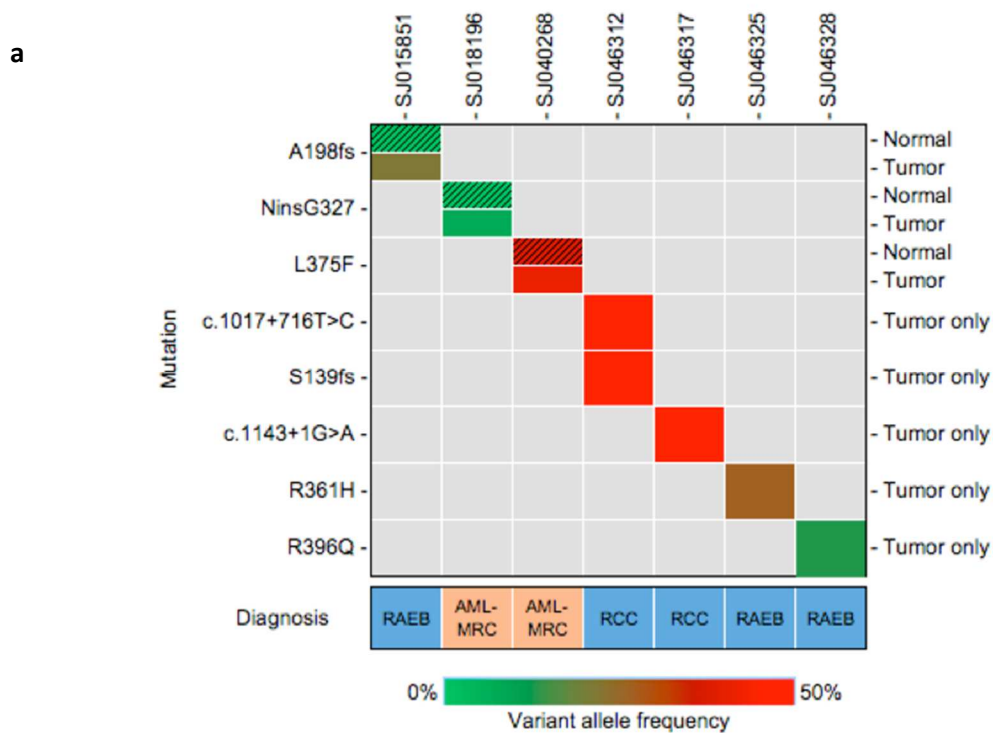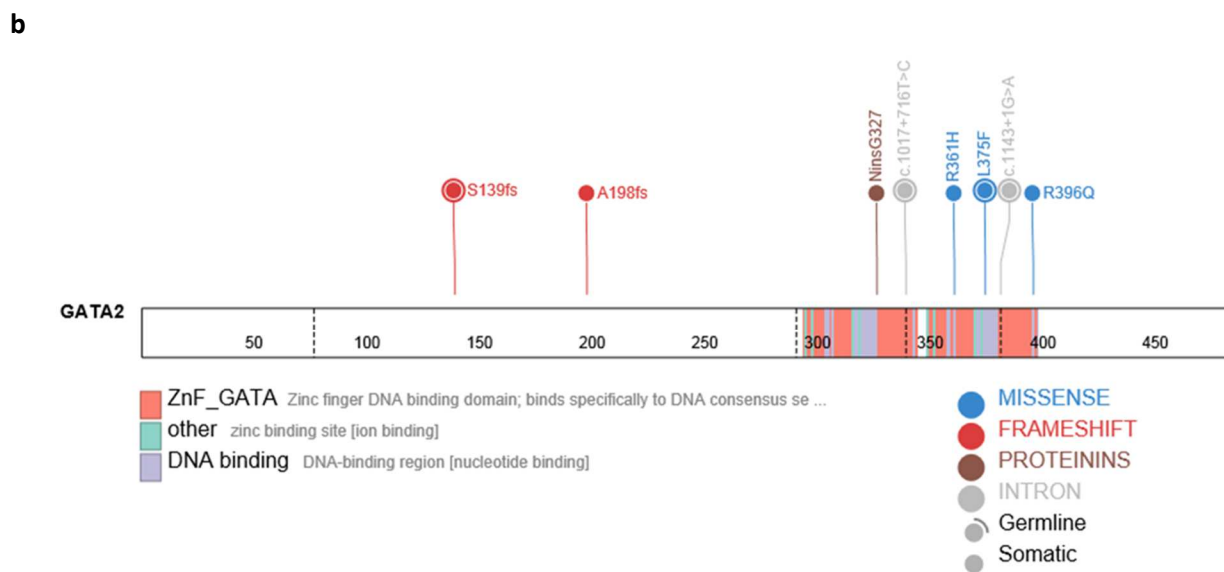

**Supplementary Figure 6: *GATA2* mutations present in the pediatric MDS cohort.** a.) Chart showing cases with a *GATA2* mutation. Right column indicates in which source the mutation was identified. Color range is relative to the VAF of the specific mutation. b.) Mutation locations relative to protein domains of *GATA2*.

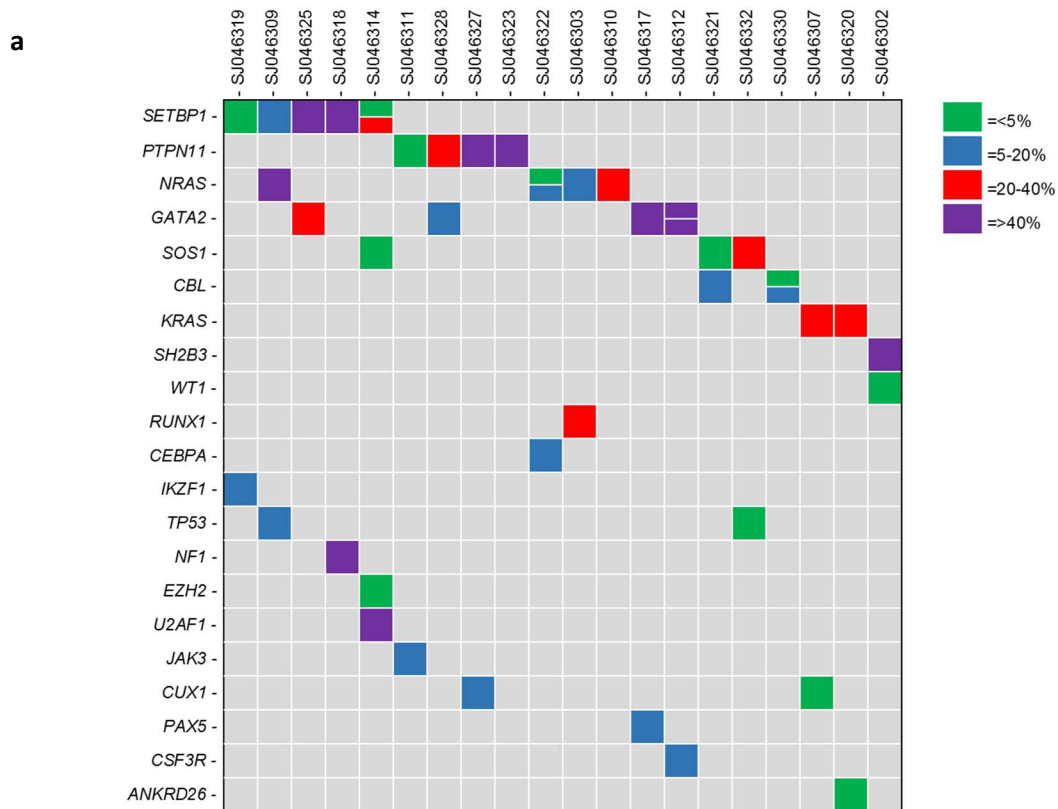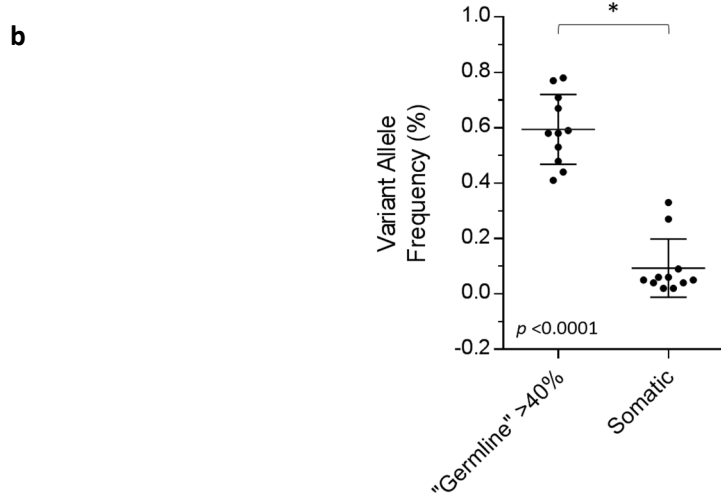

**Supplementary Figure 7:** a.) Genomic alterations identified in 20 tumor-only cases. Three of the 23 total tumor-only samples had no mutations identified. VAF is indicated by color (see legend). b.) Eleven "germline" variants with VAF's  $>40\%$  are significantly higher than other somatic variants found in those patients. Error bars represent standard deviation and the means are represented with the center bars.



a

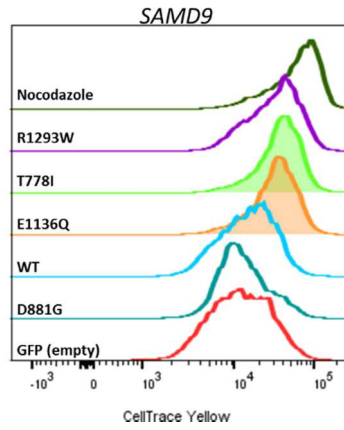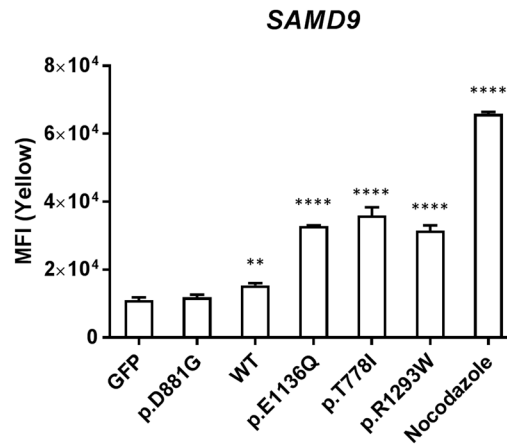

b

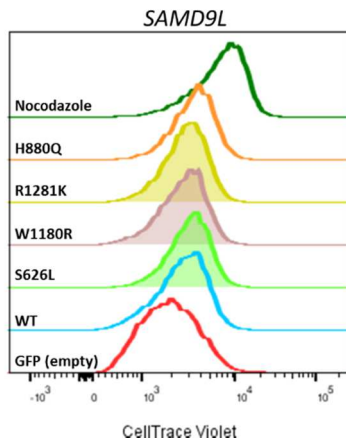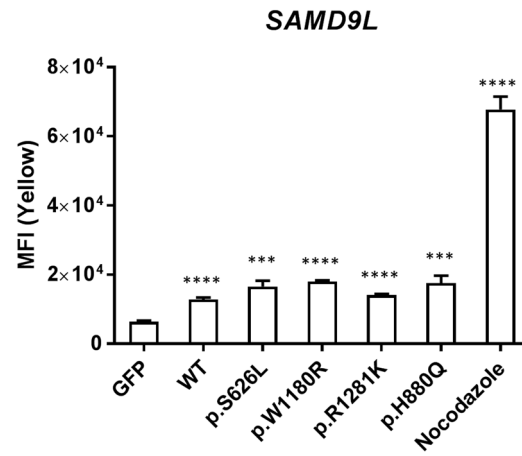

c

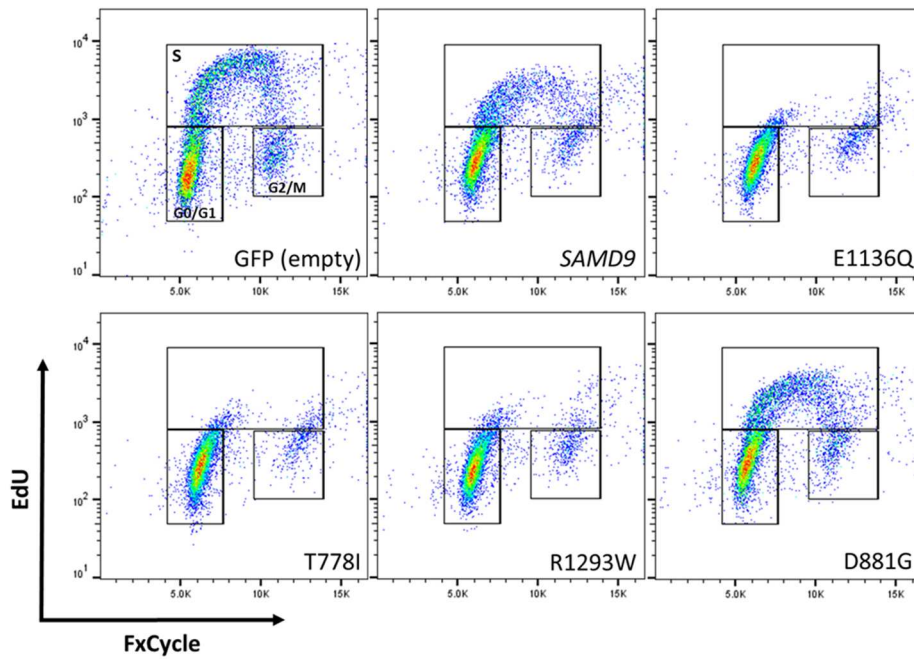

**Supplementary Figure 8: Gain-of-function mutations in *SAMD9* and *SAMD9L* decrease cell proliferation** a.) CellTrace Yellow™ (CTY) dye dilution cell proliferation assay. Nocodazole (control) inhibits microtubule formation and therefore cell proliferation. *SAMD9* p.R1293W (positive control) has previously been shown to be a gain-of-function mutation in MIRAGE syndrome<sup>3</sup>. *SAMD9* p.D881G is a common SNP that is not predicted to be pathogenic. b.) *SAMD9L* CTY dye dilution cell proliferation assay. *SAMD9L* p.H880Q (positive control) is a gain-of-function mutation previously reported in Ataxia-Pancytopenia syndrome<sup>4</sup>. Data is representative of 2-3 experiments completed in triplicate. \*\*:  $p < 0.01$ , \*\*\*:  $p < 0.001$ , \*\*\*\*:  $p < 0.0001$ . Error bars indicated standard deviation. c.) Flow cytometry plots (FxCycle-total DNA content vs. EdU incorporation) showing the cell cycle inhibiting effects of gain-of-function *SAMD9* mutations.

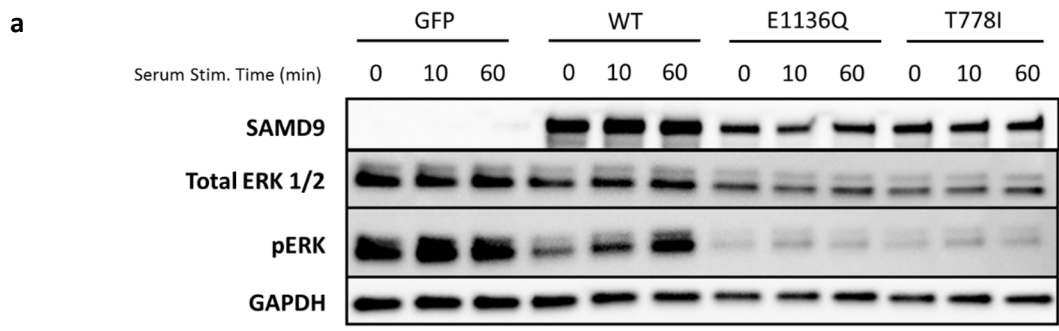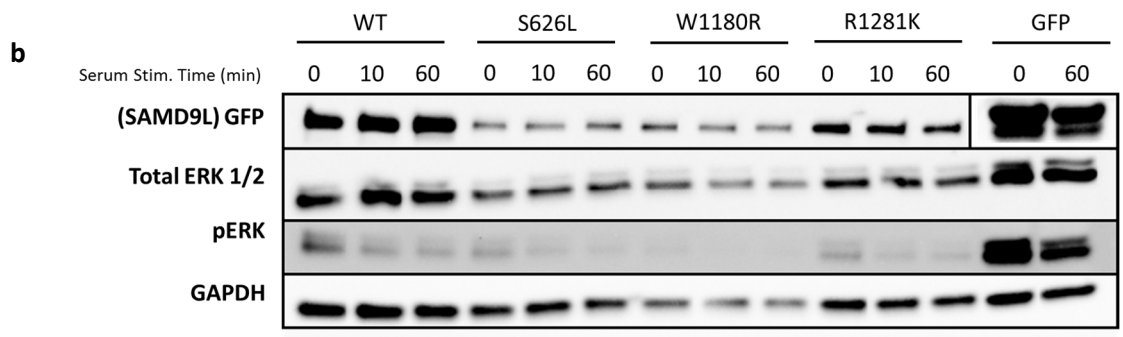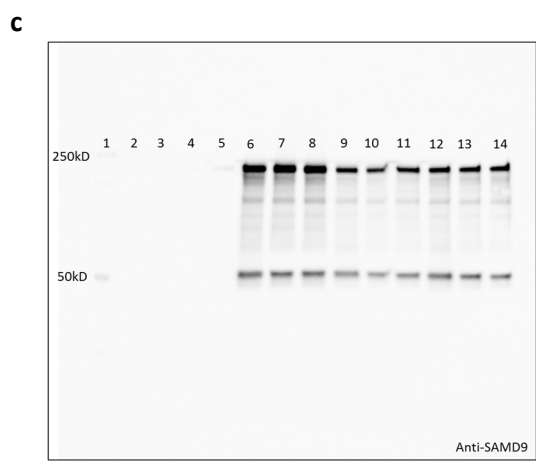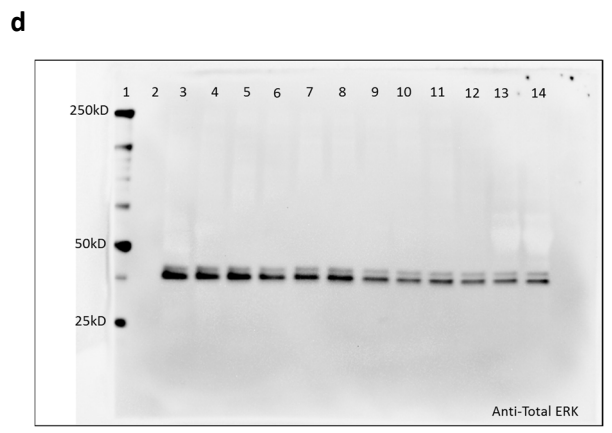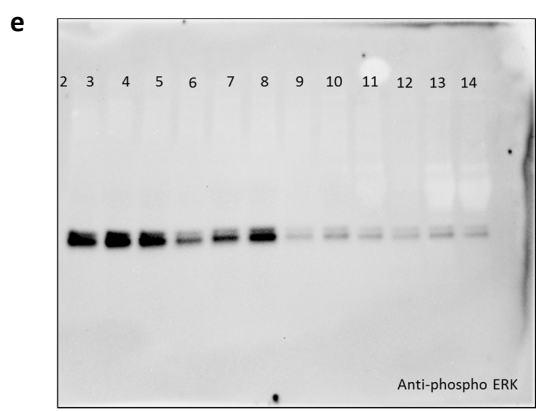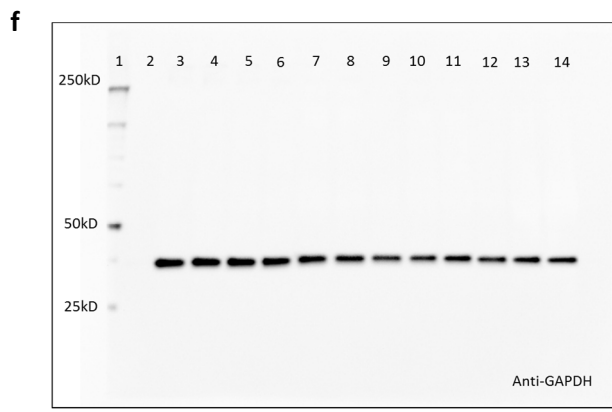

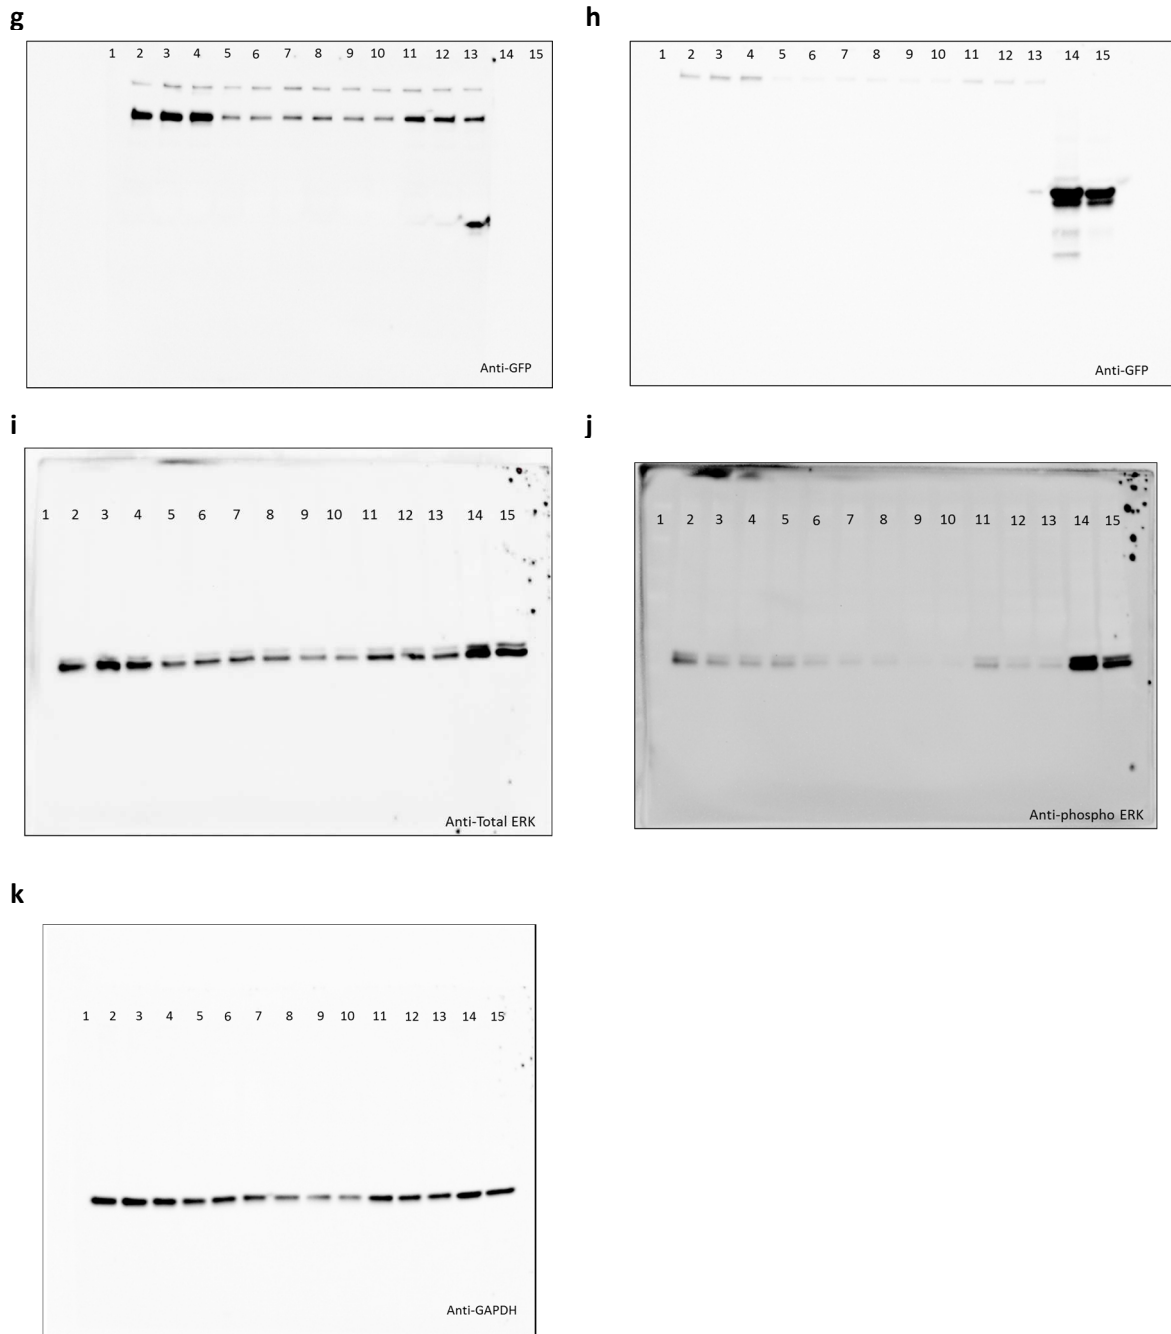

**Supplementary Figure 9: SAMD9/L mutations inhibit the induction of ERK phosphorylation.**

Immunoblots for SAMD9 (a) or GFP (SAMD9L) (b) and phosphorylated ERK following 0, 10, & 60 minutes of serum stimulation. Full western blots of each antibody are shown in panels c (SAMD9), d (Total ERK), e (phosphorylated ERK), and f (GAPDH) for SAMD9 studies. Full western blots of each antibody are shown in panels g & h (GFP), i (Total ERK), j (phosphorylated ERK), and k (GAPDH) for SAMD9L studies. Data is representative of 2 biological replicates. For blots in panels c-f, Lane 1: molecular weight marker, Lane 2: blank, and following lanes correspond to the labels in panel a. For panel e the molecular weight marker was removed from the blot due to substantial differences in chemiluminescence signal between it and the target. For blots in panels g-k Lane 1: molecular weight marker, although the secondary for the marker was not used, therefore the absence of signal. Lanes 2-15 correspond to the labels in panel b. Lanes 14 and 15 of blots in panels g and h were exposed separately given the large differences in chemiluminescence signal.

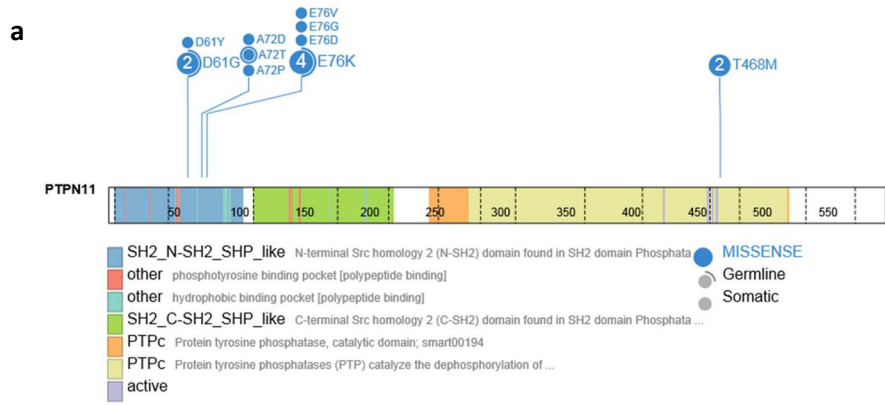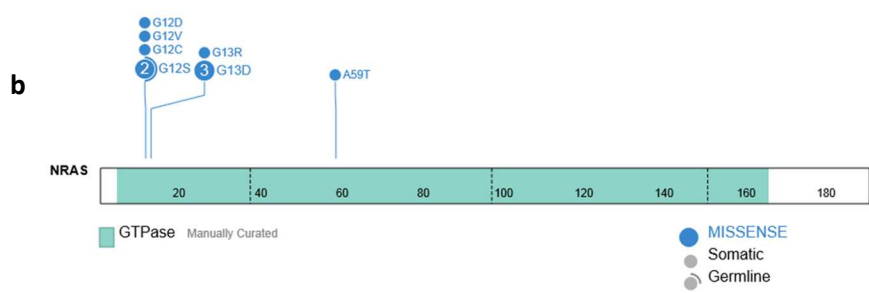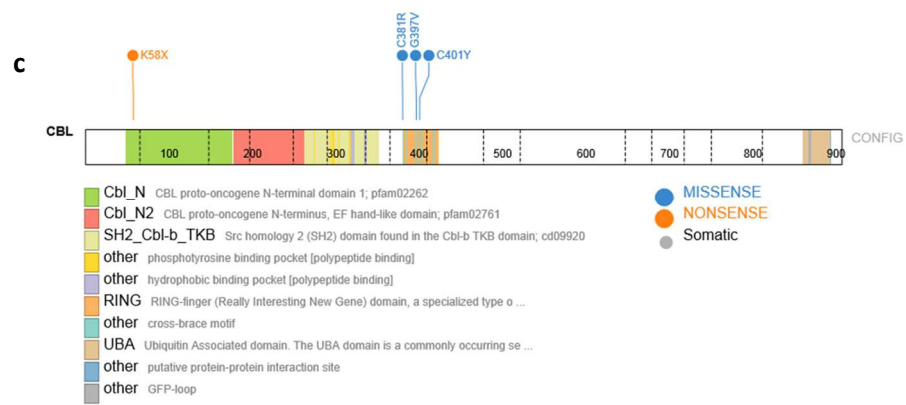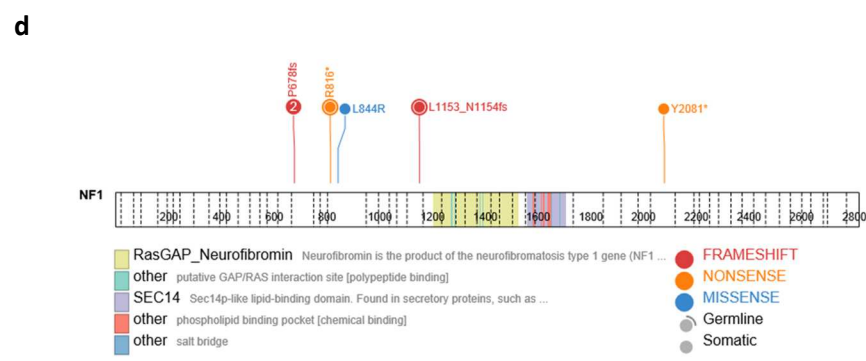

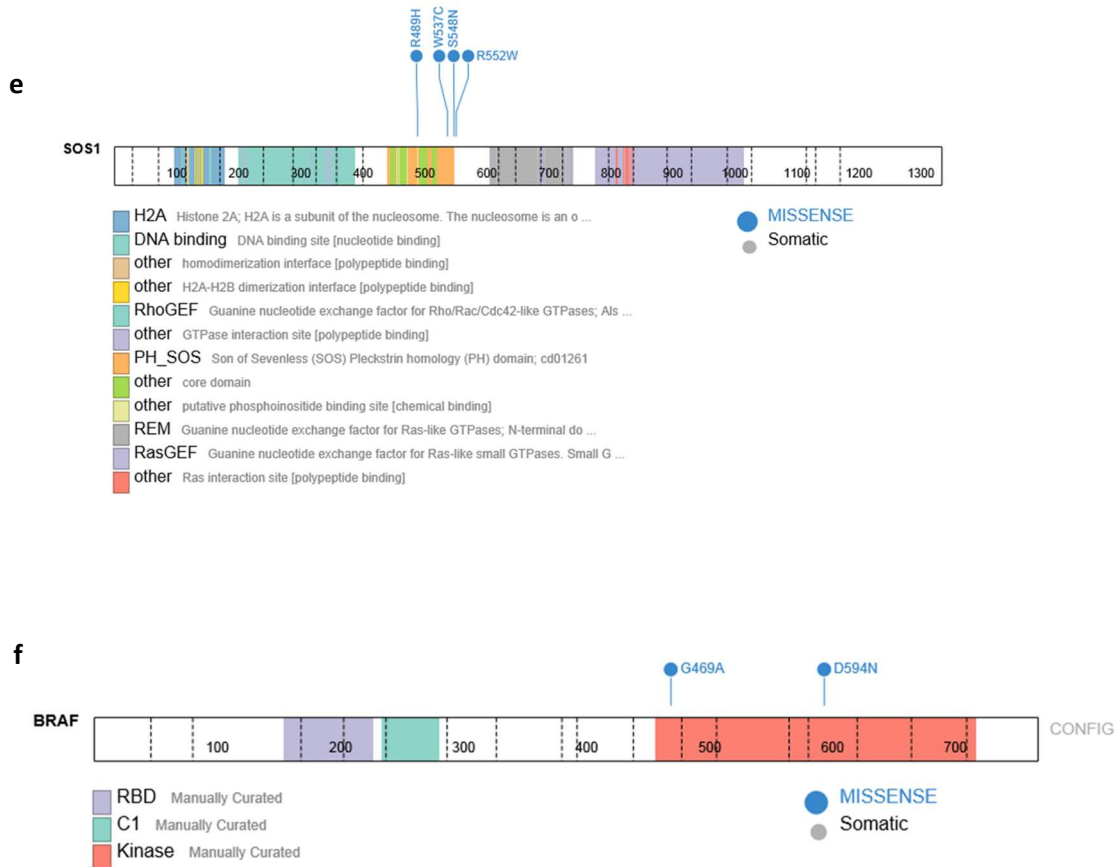

**Supplementary Figure 10: Ras/MAPK pathway mutations.** Protein Paint schematics showing locations of mutations present in *PTPN11* (a), *NRAS* (b), *CBL* (c), *NF1* (d) *SOS1* (e), *BRAF* (f) found in our pediatric primary MDS cohort.

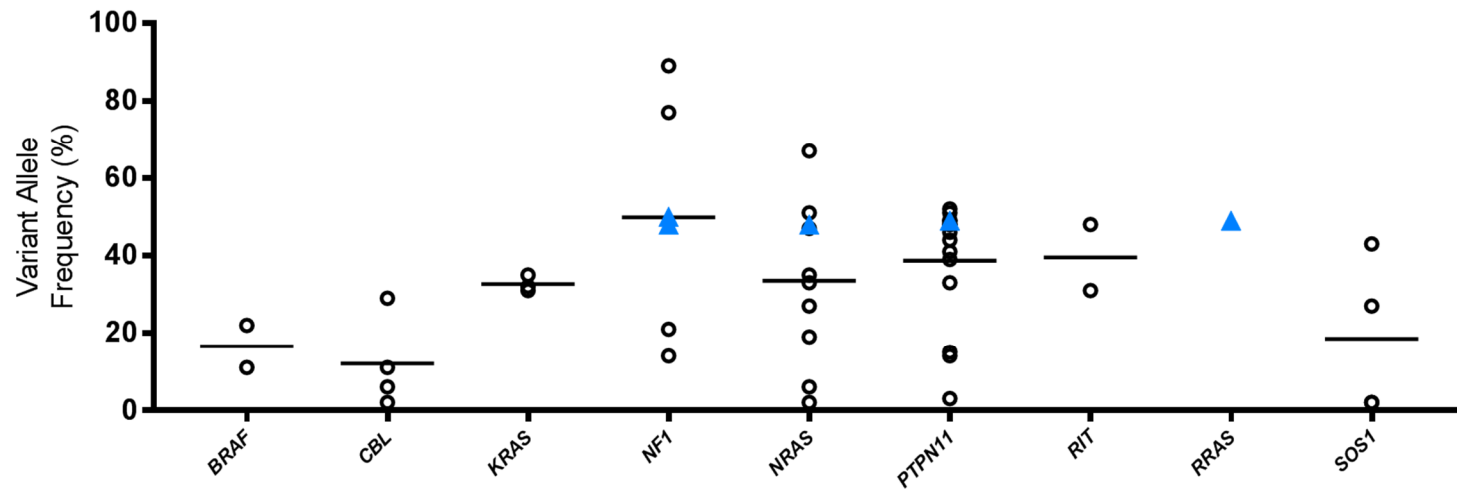

**Supplementary Figure 11: Ras/MAPK pathway mutation VAF's.** Tumor VAF's of all Ras/MAPK pathway mutations present in the pediatric MDS cohort (n = 77). Patients with presumed germline variants are indicated by the solid, blue triangles.

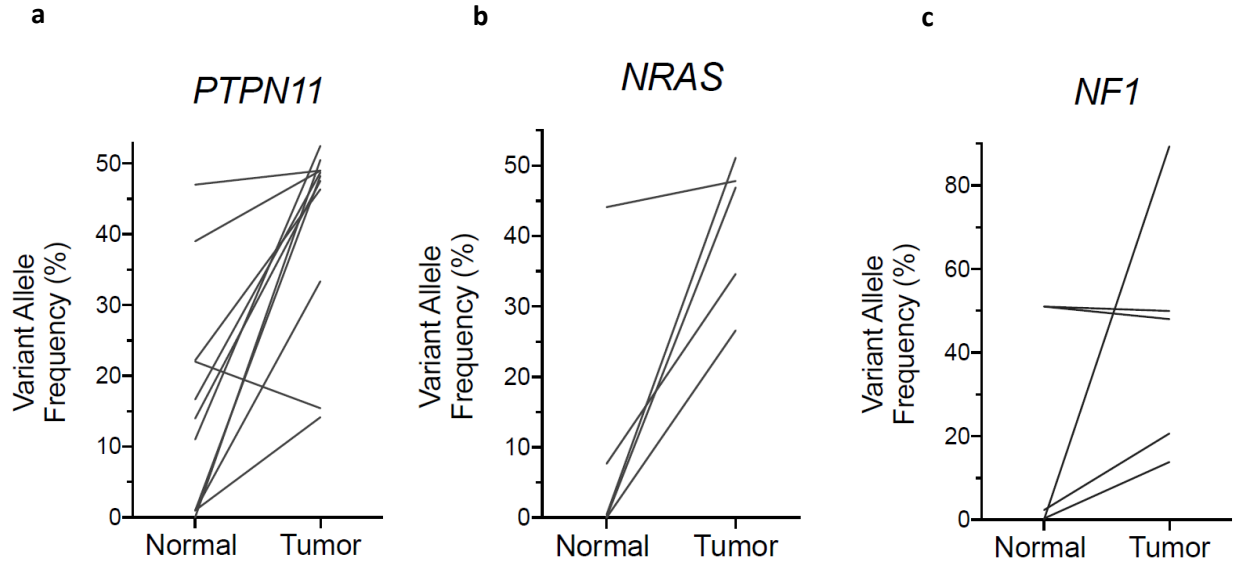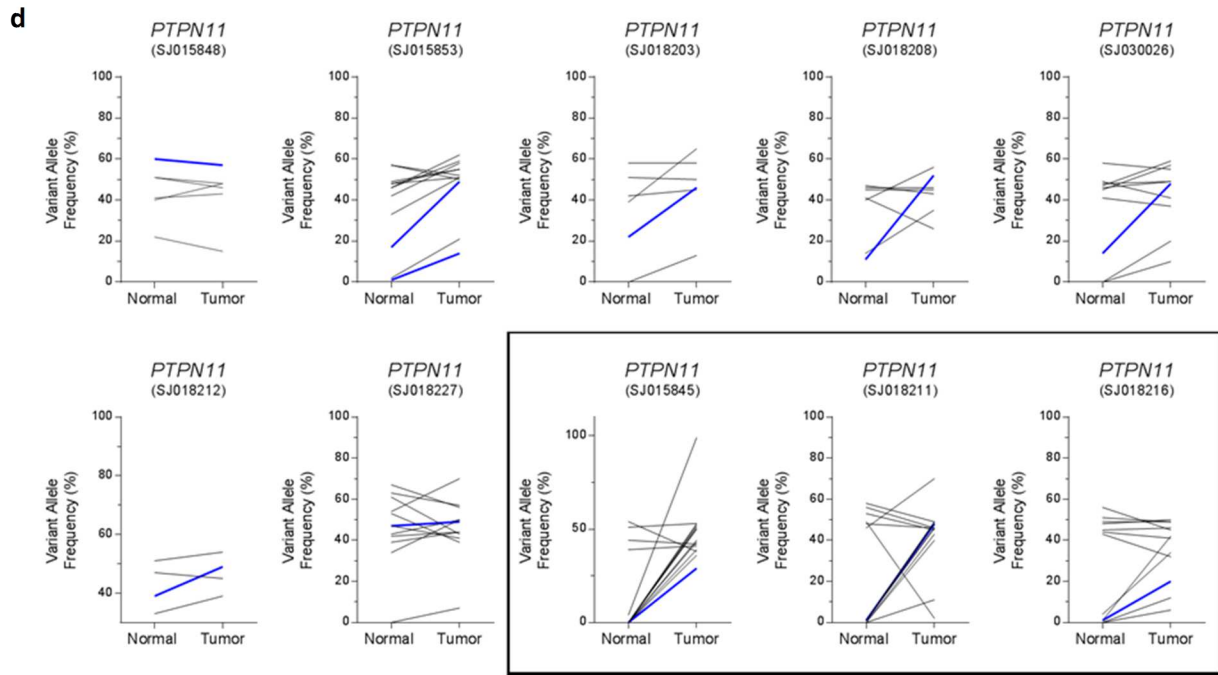



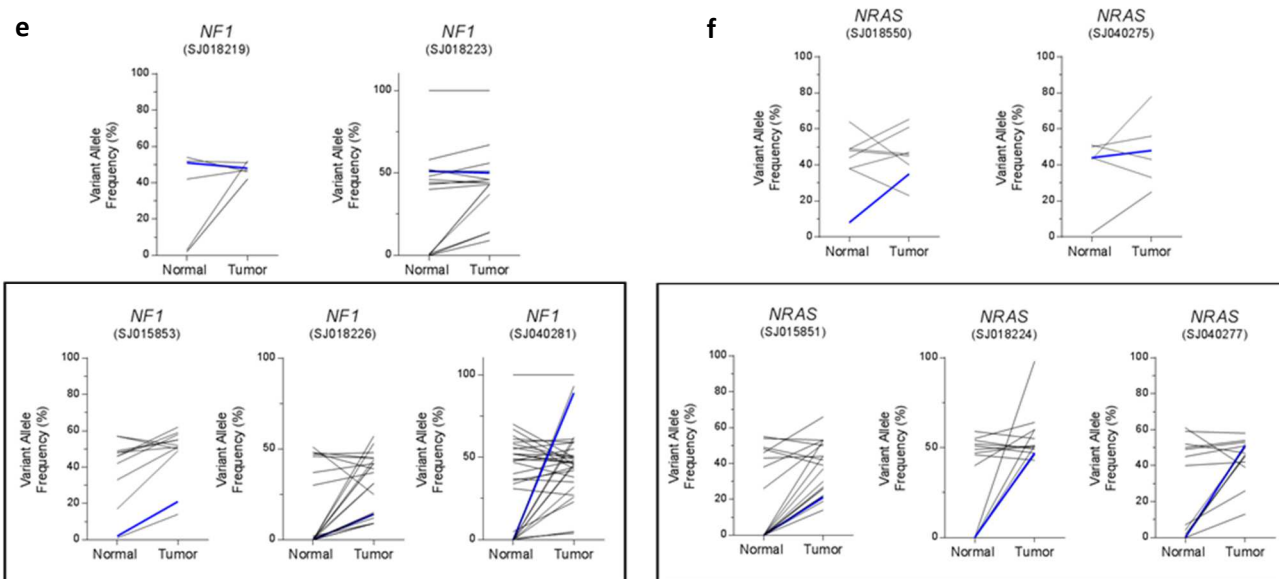

**Supplementary Figure 12: Definition of germline variants.** VAF plots of patients with *PTPN11* (a), *NRAS* (b), and *NF1* (c) mutations. Only data from WES is shown. In each patient with a *PTPN11*, *NF1*, or *NRAS* mutation in panels a, b, and c, all somatic and presumed germline calls for the individual patients are shown in groups (*PTPN11* (d), *NF1* (e), and *NRAS* (f)). Blue lines indicate the *PTPN11*, *NF1*, and *NRAS* mutations from panels a, b, and c. The plots that are inside the black boxes are those patients in which there is no evidence for the variant in the lymphocytes. Notably, the patients without an obvious deleterious “germline” variant (black boxes) tended to have many more mutations as compared to the cases with evidence of the *PTPN11*/*NRAS*/*NF1* variants in the lymphocyte fraction. Further, because the patients with potential germline variants in these important genes tended to have less mutation burden overall (average: 5 mutations/patient for total cohort), it is difficult to determine mosaicism with confidence.

**a**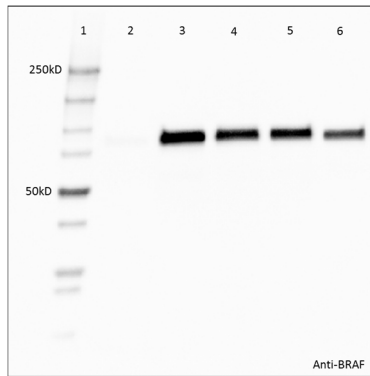**b**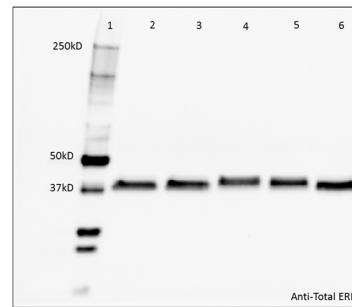**c**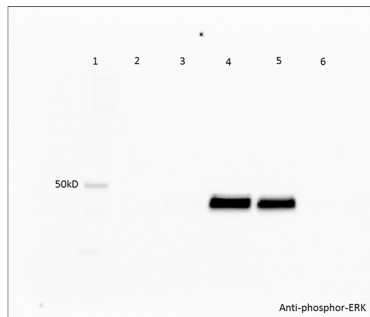**d**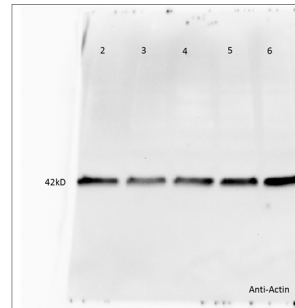

**Supplementary Figure 13: Full western blots for transient transfection of *BRAF* mutations in 293T cells.** a.) BRAF. b.) Total ERK. C.) phosphorylated ERK. d.) Actin. Lane 1: molecular weight marker, Lane 2: empty vector, Lane 3: BRAF-WT, Lane 4: BRAF-V600E, Lane 5: BRAF-G469A, Lane 6: BRAF-D594N. Note: molecular weight marker was removed from the blot due to substantial differences in chemiluminescence signal between it and the target.

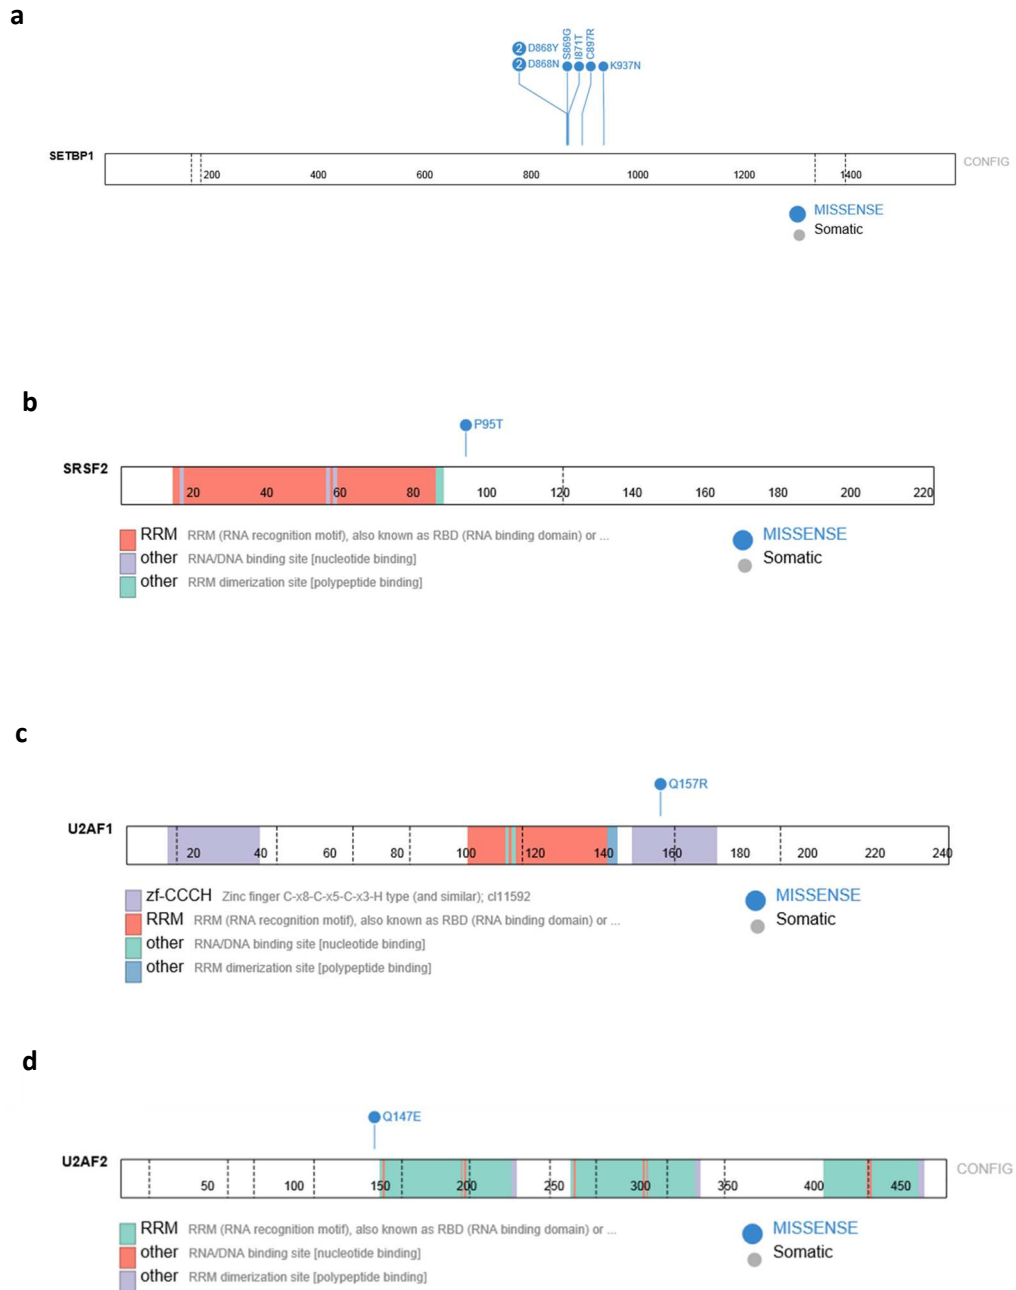

**Supplementary Figure 14:** Protein Paint schematics showing locations of somatic mutations present in other selected genes in our pediatric primary MDS cohort. *SETBP1* (a), *SRSF2* (b), *U2AF1* (c), *U2AF2* (d).



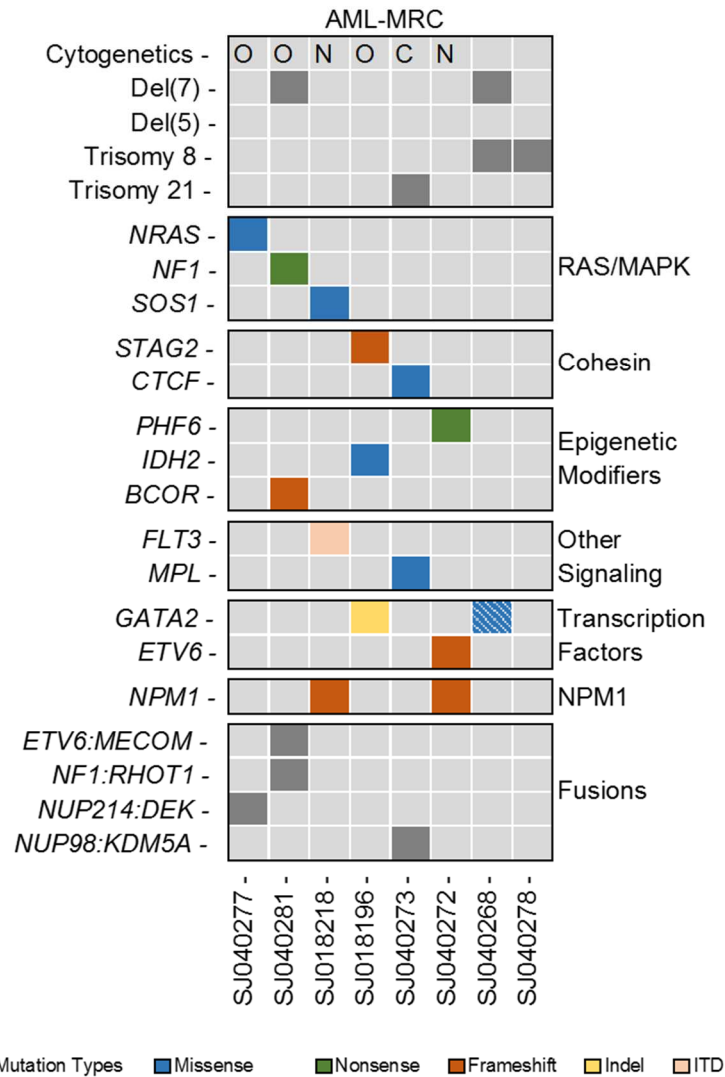

**Supplementary Figure 16: Genomic alterations in AML-MRC.** Heat map showing somatic mutations, presumed germline variants (cells with hatched lines), and transcript fusions present in the AML-MRC cohort (n=8).

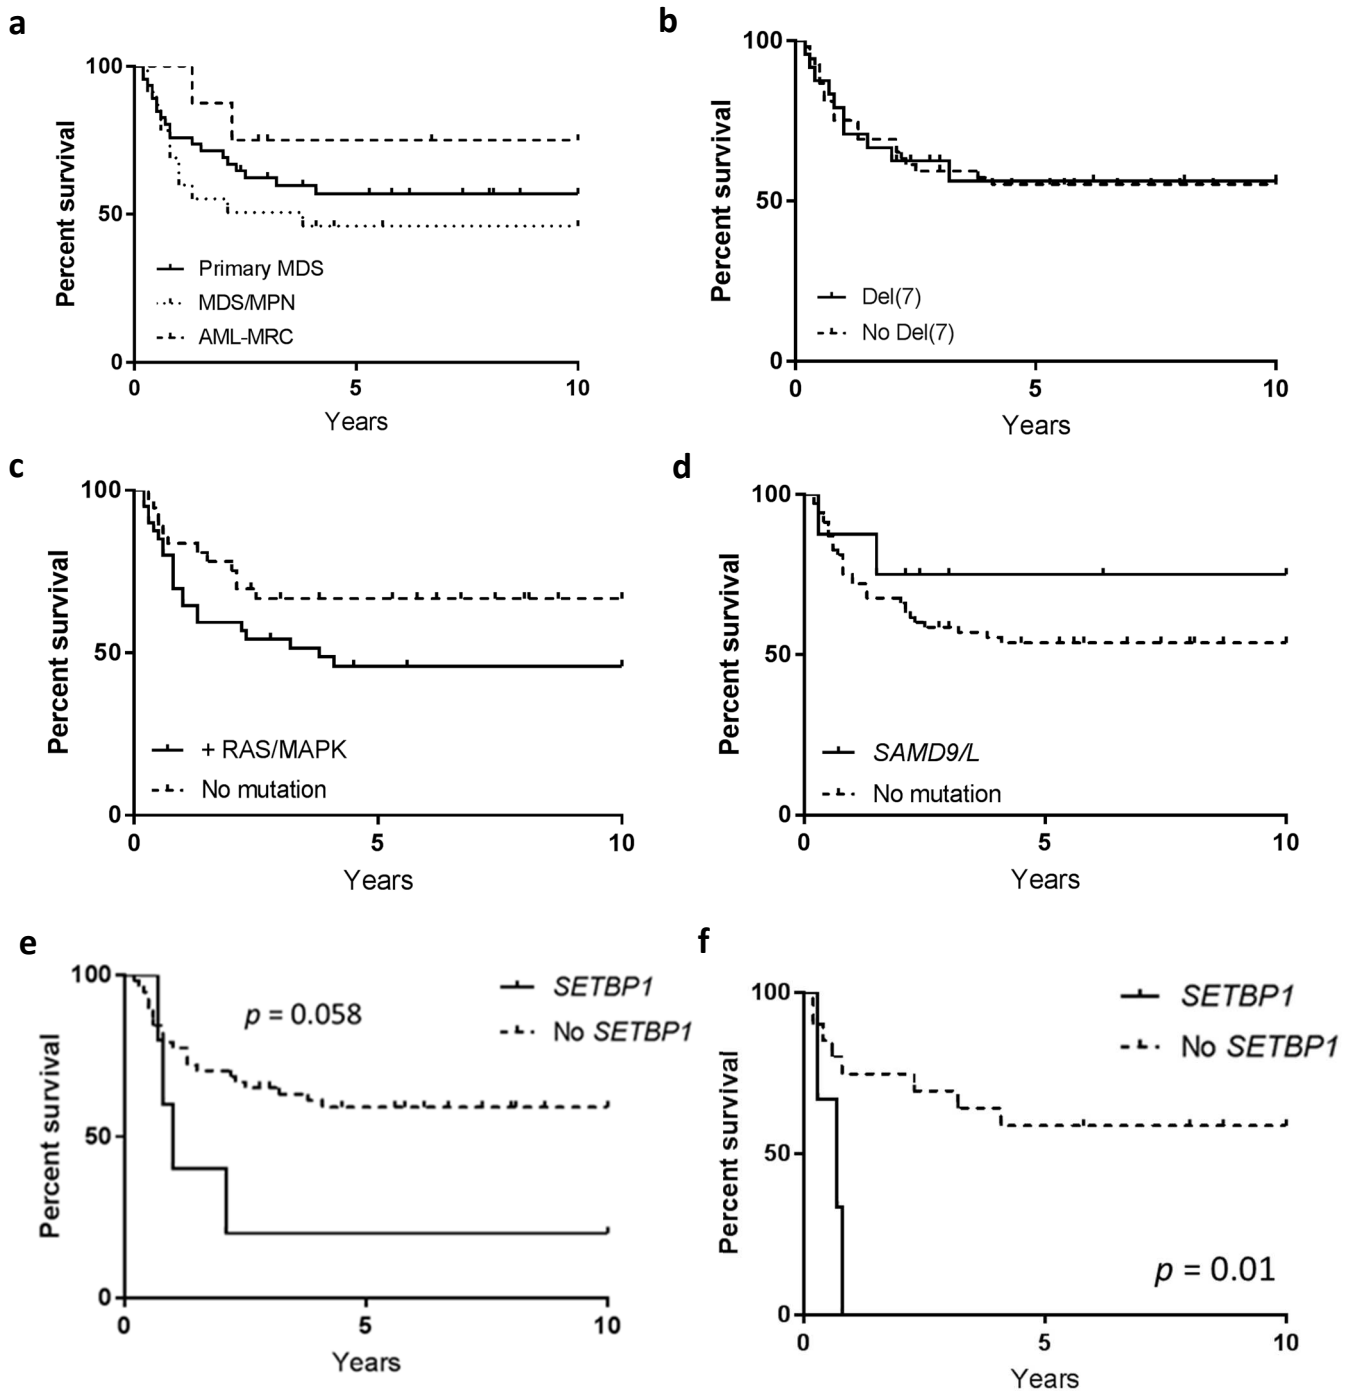

**Supplementary Figure 17: Overall survival of pediatric MDS.** a-d.) Overall survival is not significantly different between primary MDS, MDS/MPN, and AML-MRC. Survival is also not significantly different if del(7), a RAS/MAPK mutation, or a SAMD9/L mutation is present. e.) Overall survival patients who received a hematopoietic stem cell transplant was not significantly different if a *SETBP1* mutation was present. f.) RAEB patients with a *SETBP1* mutation had a significantly poorer overall survival. Statistical comparisons were made with the log-rank test.

a

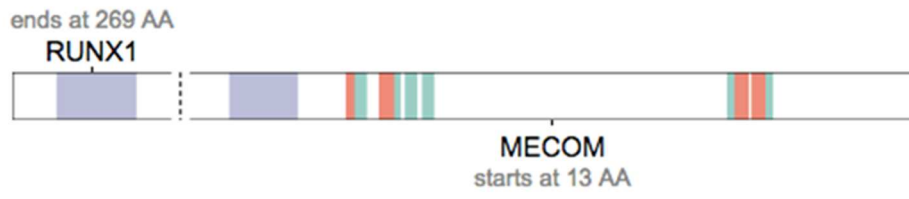

b

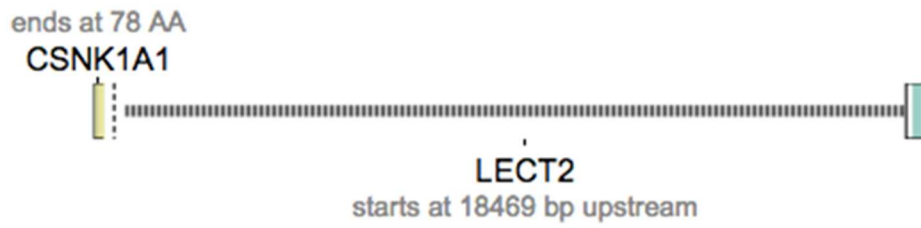

**Supplementary Figure 18: Fusion events present in primary MDS: *RUNX1-MECOM* (a) and *CSNK1A1-LECT2* (b).**

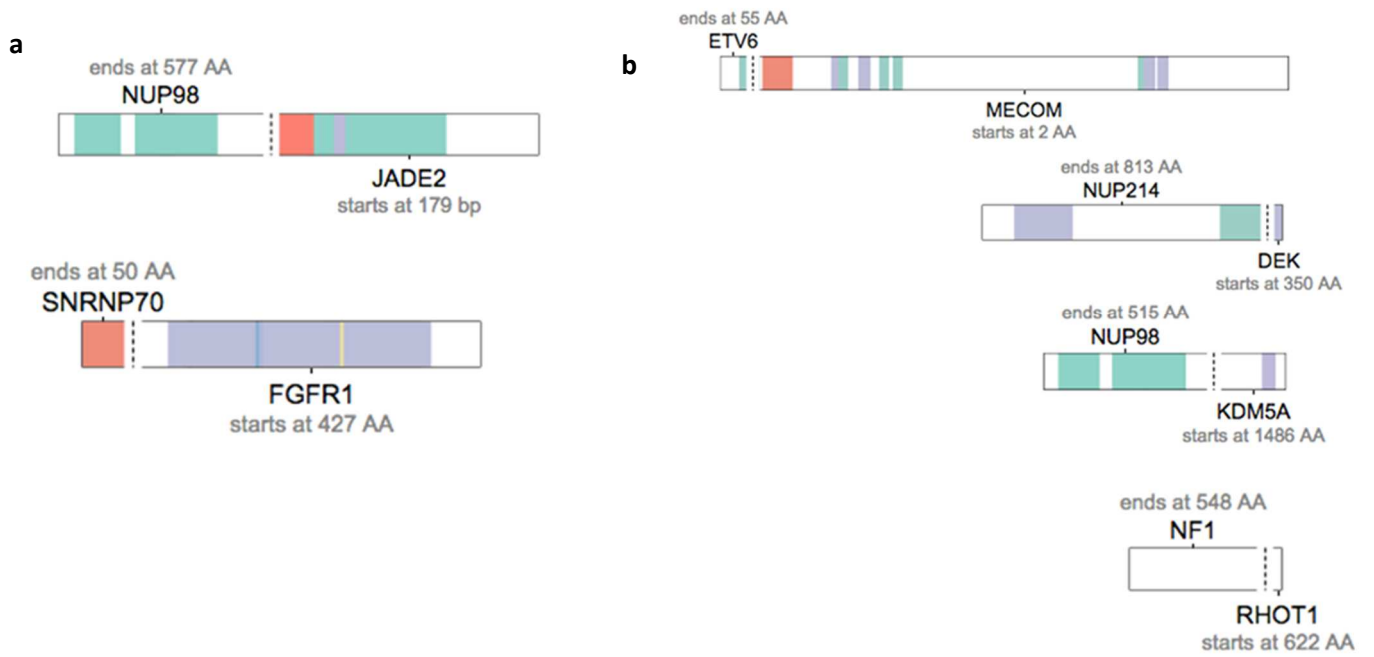

**Supplementary Figure 19: Fusion events present in MDS/MPN (a) and AML-MRC (b).**



## References

1. Alexandrov, L.B. *et al.* Signatures of mutational processes in human cancer. *Nature* **500**, 415-21 (2013).
2. Schwartz, J. *et al.* Germline SAMD9 Mutation in Siblings with Monosomy 7 and Myelodysplastic Syndrome. *Leukemia* **Accepted**(2017).
3. Narumi, S. *et al.* SAMD9 mutations cause a novel multisystem disorder, MIRAGE syndrome, and are associated with loss of chromosome 7. *Nat Genet* **48**, 792-7 (2016).
4. Chen, D.H. *et al.* Ataxia-Pancytopenia Syndrome Is Caused by Missense Mutations in SAMD9L. *Am J Hum Genet* **98**, 1146-58 (2016).
